# Supplementary material for: Markers of endothelial glycocalyx dysfunction in Clarkson disease
Source: J Transl Med. 2022 Aug 29;20:380. doi: 10.1186/s12967-022-03587-1 (PMC9421105; doi:10.1186/s12967-022-03587-1)
Supplement: Supplementary file 3 — Additional file 3. Table S3 upregulated gene sets in ISCLS BOECs relative to controls using GO cellular component Gene set enrichment analysis (GSEA). [file 12967_2022_3587_MOESM3_ESM.xlsx]

## Sheet: enrichment_results_wg_result165
geneSet	description	enrichmentScore	normalizedEnrichmentScore	pValue	FDR	size	Glycocalyx_gene	userId
GO:0098798	mitochondrial protein complex	0.529784	2.54845	0	0	245		ATP5F1C;ATP5F1D;ATP5MC3;ATP5MG;ATP5PB;ATP5PD;C15orf48;CHCHD10;CHCHD3;CHCHD6;COX5A;COX5B;COX6A1;COX7A2L;COX7C;CYC1;DAP3;DNAJC11;GRPEL1;HSD17B10;IMMP2L;MALSU1;MCCC1;MICU2;MRPL10;MRPL12;MRPL17;MRPL19;MRPL2;MRPL20;MRPL21;MRPL23;MRPL24;MRPL28;MRPL32;MRPL34;MRPL36;MRPL37;MRPL38;MRPL39;MRPL4;MRPL41;MRPL43;MRPL44;MRPL49;MRPL52;MRPL53;MRPL55;MRPL57;MRPL58;MRPS10;MRPS12;MRPS18A;MRPS18B;MRPS2;MRPS22;MRPS24;…
GO:0030684	preribosome	0.617265	2.43493	0	0	70		BOP1;BYSL;EIF6;EMG1;FTSJ3;IMP3;IMP4;MAK16;NOC2L;NOP14;NOP56;NSA2;PES1;PPAN;RIOK2;RIOK3;RRP1;RRP7A;RRP9;RRS1;RSL1D1;SNU13;TSR1;UTP14A;UTP23;UTP3;UTP4;WDR3;WDR46;WDR74;ZNF593;ZNF622
GO:0070469	respiratory chain	0.587132	2.41922	0	0	84		C15orf48;COX15;COX5A;COX5B;COX6A1;COX6B1;COX7A2L;COX7B;COX7C;COX8A;CYC1;DMAC1;HIGD1A;HIGD2A;NDUFA1;NDUFA11;NDUFA13;NDUFA2;NDUFA4;NDUFA4L2;NDUFA6;NDUFA8;NDUFAB1;NDUFAF1;NDUFB1;NDUFB3;NDUFB4;NDUFB5;NDUFB7;NDUFB9;NDUFC1;NDUFC2;NDUFS3;NDUFS4;NDUFS7;NDUFS8;NDUFV1;NDUFV2;NDUFV3;SDHB;SDHC;TTC19;UQCR10;UQCR11;UQCRFS1;UQCRH;UQCRHL;UQCRQ
GO:0005743	mitochondrial inner membrane	0.457142	2.30824	0	0	406		AFG3L2;ATAD3A;ATAD3B;ATP5F1C;ATP5F1D;ATP5MC3;ATP5MG;ATP5PB;ATP5PD;ATPSCKMT;AURKAIP1;BCL2L1;C15orf48;CHCHD10;CHCHD3;CHCHD6;CNP;COA3;COQ5;COQ6;COX11;COX15;COX16;COX20;COX5A;COX5B;COX6A1;COX6B1;COX7A2L;COX7B;COX7C;COX8A;CYC1;DAP3;DMAC1;DNAJC11;DNAJC30;FDXR;GHITM;GRPEL1;HADHB;HCCS;HIGD1A;HIGD2A;HSPD1;IMMP2L;LETM2;LETMD1;MICOS13;MICU2;MICU3;MPC1;MPC2;MRPL10;MRPL12;MRPL17;MRPL19;MRPL2;MRPL20;MRPL21;MRP…
GO:0044815	DNA packaging complex	-0.727011	-2.11226	0	0	19		CENPA;HP1BP3;KAT6A;KAT6B;MPHOSPH8;NCAPD2;NCAPG;NCAPG2;NCAPH;SHPRH;SLF1;SMC2;SMC4;SOS1;SOS2
GO:0000793	condensed chromosome	-0.499706	-2.22874	0	0	193		AGO3;AHCTF1;ATRX;AURKA;BLM;BRCA1;BRCA2;BRD4;BUB1;BUB1B;CCNB1;CDK2;CENPA;CENPC;CENPE;CENPF;CENPH;CENPN;CENPO;CENPU;CENPW;CHEK1;CKAP5;CLASP1;CLASP2;CTCF;DMC1;DSN1;ERCC6L;FANCD2;FBXO28;HJURP;HMGB1;HMGB2;HNRNPU;INCENP;KANSL1;KIF2C;KIFAP3;KMT5C;KNL1;KNSTRN;KNTC1;LIG4;MAD2L1;MEI4;MIS12;MIS18BP1;MKI67;NCAPD2;NCAPG;NCAPG2;NCAPH;NDE1;NSMCE4A;NUDCD2;NUF2;NUP107;NUP133;ORC2;PHF2;PHF6;PLK1;RAD21;RAD51;RASSF2…
GO:0098687	chromosomal region	-0.501354	-2.36868	0	0	300	HELLS	AHCTF1;APC;ATRX;AURKA;AURKB;BLM;BRCA2;BUB1;BUB1B;CBX1;CBX5;CCNB1;CDCA8;CDK1;CDK2;CENPA;CENPC;CENPE;CENPF;CENPH;CENPI;CENPK;CENPL;CENPN;CENPO;CENPP;CENPQ;CENPU;CENPW;CHEK1;CHEK2;CKAP5;CLASP1;CLASP2;CLIP1;CTC1;CTCF;DAXX;DCLRE1A;DCLRE1B;DCLRE1C;DMC1;DNA2;DNMT1;DNMT3A;DOT1L;DSN1;DYNC1LI2;ERCC4;ERCC6L;ESCO2;FBXO28;FMR1;HAT1;HELLS;HJURP;HNRNPA2B1;HNRNPU;INCENP;KANSL1;KIF18A;KIF22;KIF2C;KMT5C;KNL1;KNSTR…
GO:0044455	mitochondrial membrane part	0.470558	2.19285	0	0.00016507	204		AFG3L2;APOO;ATP5F1B;ATP5F1C;ATP5F1D;ATP5MC1;ATP5MC3;ATP5MG;ATP5PB;ATP5PD;ATPSCKMT;BID;BNIP3;C15orf48;CHCHD10;CHCHD3;CHCHD6;COA3;COQ4;COQ5;COQ6;COQ8A;COX11;COX15;COX16;COX5A;COX5B;COX6A1;COX7A2;COX7A2L;COX7B;COX7C;CYC1;DMAC1;DMPK;DNAJC11;ETFDH;FIS1;FUNDC1;FUNDC2;GRPEL1;HSPD1;IMMP2L;MFF;MFN2;MGARP;MICOS10;MICOS13;MICU2;MPC1;MPC2;MTX1;MUL1;NDUFA1;NDUFA11;NDUFA13;NDUFA2;NDUFA4;NDUFA4L2;NDUFA6;NDUFA8;…
GO:0005840	ribosome	0.468252	2.21898	0	0.000198083	220		APEX1;AURKAIP1;DAP3;DENR;EEF2;EIF3H;FXR2;GADD45GIP1;HSPA14;MALSU1;MPV17L2;MRPL10;MRPL11;MRPL12;MRPL15;MRPL17;MRPL18;MRPL19;MRPL2;MRPL20;MRPL21;MRPL23;MRPL24;MRPL28;MRPL32;MRPL34;MRPL36;MRPL37;MRPL38;MRPL39;MRPL4;MRPL41;MRPL43;MRPL44;MRPL46;MRPL48;MRPL49;MRPL50;MRPL52;MRPL53;MRPL54;MRPL55;MRPL57;MRPL58;MRPS10;MRPS12;MRPS16;MRPS18A;MRPS18B;MRPS2;MRPS22;MRPS23;MRPS24;MRPS25;MRPS26;MRPS28;MRPS30;MRPS…
GO:0070069	cytochrome complex	0.665823	2.17889	0	0.000282976	25		C15orf48;COX15;COX5A;COX5B;COX6A1;COX6B1;COX7B;COX7C;COX8A;CYC1;NDUFA4;NDUFA4L2;UQCR10;UQCRFS1;UQCRH;UQCRHL;UQCRQ
GO:0030964	NADH dehydrogenase complex	0.570296	2.06741	0	0.000742813	44		DMAC1;NDUFA1;NDUFA11;NDUFA13;NDUFA2;NDUFA4;NDUFA6;NDUFA8;NDUFAB1;NDUFAF1;NDUFB1;NDUFB3;NDUFB4;NDUFB5;NDUFB7;NDUFB9;NDUFC1;NDUFC2;NDUFS3;NDUFS4;NDUFS6;NDUFS7;NDUFS8;NDUFV1;NDUFV2;NDUFV3
GO:0005819	spindle	-0.41787	-1.99997	0	0.0010079	301		ALMS1;ARL2BP;ASPM;ATAT1;AUNIP;AURKA;AURKB;BIRC5;BIRC6;BRCC3;BUB1B;CBX1;CCNB1;CDC14A;CDC20;CDC25B;CDC27;CDC6;CDCA8;CDK1;CDK5RAP2;CENPE;CENPF;CEP128;CEP162;CEP170;CEP295;CEP44;CEP63;CEP85;CEP89;CEP95;CHAMP1;CKAP2;CKAP2L;CKAP5;CLASP1;CLASP2;CLTC;CSPP1;CTNNB1;DIAPH1;DIDO1;DLGAP5;DSN1;ECT2;ESPL1;FAM161A;FAM83D;FBXO5;GOLGA2;GPSM2;HASPIN;HAUS1;HAUS2;HAUS3;HAUS4;HAUS5;HAUS6;HAUS8;HECW2;HNRNPU;INCENP;INO8…
GO:0034399	nuclear periphery	-0.454502	-1.94198	0	0.00241897	126		AHCTF1;ARFGEF1;ATF7;ATN1;ATXN3;ATXN7;BLM;CENPF;CENPW;CLIC4;DAG1;DCAF7;DDX39B;DNMT3A;GMCL1;HAT1;HNRNPA2B1;HNRNPM;HNRNPU;KIF4A;LMNB1;LMNB2;MAP2;NUP107;NUP153;NUP205;NUP35;NUP93;PAXIP1;POLA1;PPIG;PRPF40A;PSPC1;RAD21;RGS12;SCAF8;SFPQ;SMC1A;SMC3;SORBS1;SPARC;SRRM1;STAG1;STAG2;SUV39H1;TEP1;TGFB1I1;THOC1;TP53;TPR
GO:0016469	proton-transporting two-sector ATPase complex	0.536066	1.92363	0	0.00286121	42		ATP5F1D;ATP5MC3;ATP5MG;ATP5PB;ATP5PD;ATP6V0A4;ATP6V0B;ATP6V0C;ATP6V0D1;ATP6V0E1;ATP6V0E2;ATP6V1D;ATP6V1E1;ATP6V1F;ATP6V1G1;ATP6V1H;CCDC115;PPIF;TCIRG1
GO:0031970	organelle envelope lumen	0.478765	1.91732	0	0.00297125	78	CAT	ARL2;BCHE;BLOC1S1;CAPN2;CAT;CHCHD10;CHCHD4;CHCHD5;CHCHD7;COA4;COA6;COA7;COX6B1;GFER;HAX1;MICU2;NDUFA8;NDUFB7;NME4;PANK2;PINK1;PRELID1;PRELID3A;PRELID3B;REXO2;SDHAF3;SHMT2;SOD1;SORL1;THOP1;TIMM10;TIMM10B;TIMM13;TIMM23;TIMM8A;TIMM8B;TIMM9;UQCC2
GO:0005759	mitochondrial matrix	0.36461	1.85587	0	0.00567239	429	CAT;CLPP	ACAA2;ACO2;ACOT2;ALAS1;ALDH1B1;ALDH1L2;ALDH5A1;ALKBH7;ARL2;ATAD3A;ATG4D;ATP5F1C;ATP5F1D;ATP5PB;BCL2L1;BCO2;BLOC1S1;C1QBP;CA5B;CARS2;CHPF;CLPP;COQ5;DAP3;DECR1;DIMT1;DNAJA3;EARS2;ECHS1;ETFB;FARS2;FDX1;FDX2;FDXR;FLAD1;FXN;GADD45GIP1;GCSH;GFM2;GLRX2;GPT2;GPX1;GRPEL1;GRSF1;GSR;HADHB;HIBADH;HMGCL;HSD17B10;HSPA9;HSPD1;HSPE1;IDH3A;IDH3B;IDH3G;ISCA1;ISCU;LARS2;LYRM4;MALSU1;MARS2;MCAT;MCCC1;ME2;ME3;MIPEP;M…
GO:0016605	PML body	-0.45379	-1.83311	0	0.00768527	92		ARNTL;ATRX;BLM;CASP8AP2;CBX5;CHEK2;CIITA;DAXX;HIPK1;ISG20;KAT6A;MTOR;N4BP1;RAD51;RB1;RFWD3;RPA1;SMC5;SMC6;SRSF2;TCF7L2;TOPBP1;TP53;TP53INP2;WDFY3;ZBTB16;ZMYM2
GO:0090734	site of DNA damage	-0.480151	-1.84904	0	0.0083992	65		ACTR2;ACTR3;APLF;ATF2;AUNIP;CBX1;CBX5;ESCO2;HELB;PARP1;RAD51;RFWD3;RNF168;RPA1;SAMHD1;SLF1;SLF2;SLFN11;SMC5;SMC6;TP53BP1;WAS;WDR76;WRAP53;WRN
GO:0044450	microtubule organizing center part	-0.414738	-1.83381	0	0.00878316	158		ALMS1;AURKA;BRCA1;CCDC14;CCDC88A;CCNF;CDK5RAP2;CENPJ;CEP120;CEP128;CEP135;CEP162;CEP170;CEP192;CEP295;CEP55;CEP63;CEP72;CEP76;CEP78;CEP85;CEP89;CKAP5;CLASP1;CNTLN;CNTROB;DZIP1L;HOOK3;HTT;KIAA0586;KIF24;KIF2A;LRRCC1;MDM1;MPHOSPH9;MZT1;NEDD1;NIN;ODF2;ODF2L;PCNT;PLK1;PLK4;POC1A;POC1B;POC5;RAB8A;ROCK1;RP2;SASS6;SAXO2;SCLT1;SPAG5;SPICE1;STARD9;STIL;TNKS2;TOP2A;TTBK2;TUBD1;TUBG1;TUBGCP3;TUBGCP6
GO:0030496	midbody	-0.395334	-1.75387	0	0.0160145	160	GLB1; LAP3	ANLN;ARL2BP;ASPM;AURKA;AURKB;BCL3;BIRC6;CDCA8;CDK1;CENPC;CENPE;CENPF;CEP44;CEP55;CIT;CLIC4;CNTRL;CTNND1;DNM2;DTNBP1;ECT2;EXOC2;EXOC5;EXOC6;FLCN;GNAI1;GNAI2;GNAI3;HNRNPU;HSP90B1;HSPA5;INCENP;IQGAP1;KIF13A;KIF14;KIF20A;KIF20B;KIF23;KIF4A;KLHDC8B;KLHL13;KLHL9;LAP3;MICAL3;MITD1;MYH10;NEK2;NUP62;PIK3CB;PKN2;PKP4;PLK1;PRC1;PSRC1;PTCH1;RAB8A;RACGAP1;RALA;RAP2A;RCC2;SH3GLB1;SHCBP1;SPAG5;SPAST;SSH1;TACC1;…
GO:1990204	oxidoreductase complex	0.41604	1.72461	0	0.017745	91		CYBA;CYC1;DMAC1;GCSH;KAT2A;NDUFA1;NDUFA11;NDUFA13;NDUFA2;NDUFA4;NDUFA6;NDUFA8;NDUFAB1;NDUFAF1;NDUFB1;NDUFB3;NDUFB4;NDUFB5;NDUFB7;NDUFB9;NDUFC1;NDUFC2;NDUFS3;NDUFS4;NDUFS6;NDUFS7;NDUFS8;NDUFV1;NDUFV2;NDUFV3;NOXO1;P4HA1;PDHX;PDK2;SDHB;SDHC;UQCR10;UQCRFS1;UQCRH;UQCRHL;UQCRQ
GO:1905368	peptidase complex	0.417	1.70247	0	0.0194274	85		ADRM1;AFG3L2;DNAJB2;HTRA2;PAAF1;PSMA1;PSMA5;PSMA6;PSMB1;PSMB10;PSMB2;PSMB3;PSMB4;PSMB5;PSMB6;PSMB7;PSMC2;PSMC4;PSMC5;PSMD12;PSMD13;PSMD14;PSMD2;PSMD3;PSMD4;PSMD6;PSMD8;PSMD9;PSME3;PSMF1;PSMG3;RAD23A;SEC11C;SPCS1;SPG7;TAF12;TAF9;TXNL1;ZFAND2A;ZFAND2B
GO:0005657	replication fork	-0.447609	-1.72086	0	0.0203597	65		BAZ1B;BLM;CDC45;CDC5L;DNMT1;DONSON;GINS2;GINS4;HELB;MCM10;MCM3;MMS22L;PIF1;POLA1;POLA2;POLD1;POLD3;PRIM1;RAD51D;RFC1;RFC2;RFC3;RFC4;RFC5;RPA1;RPA3;SMARCA5;SMARCAD1;TIMELESS;TP53BP1;UHRF1;WRN;XPA;XRCC2;XRCC3;ZRANB3
GO:0031904	endosome lumen	0.538371	1.65854	0.00425532	0.027378	22		CD63;CTSL;JAK2;LRPAP1;NAPSA;PDLIM4
GO:0016607	nuclear speck	-0.338485	-1.64873	0	0.0357806	360	MAML2	ACIN1;AFDN;AR;ATXN2L;BARD1;BAZ2A;BCLAF1;BMP2K;CASC3;CBLL1;CCNB3;CDC25C;CDC5L;CDK12;CHD5;CLK2;CPSF6;CRNKL1;CWC22;DAZAP2;DDX17;DDX39A;DDX39B;DDX42;DDX46;DOCK1;EFTUD2;EP400;EPAS1;FAM76B;FTO;FYTTD1;GATAD2B;GLYR1;GRK5;GTF2H2;HAUS6;HBP1;HDAC5;HIPK1;HNRNPU;HP1BP3;IL16;JADE1;KAT6A;KIF22;KMT2E;LUC7L2;LUC7L3;MAML1;MAML2;MAML3;MAPK14;MBD4;MECOM;MEF2C;MEOX2;METTL3;NAMPT;NCAPG2;NCBP3;NXF1;OIP5;PACSIN2;PHF7;PN…
GO:0000790	nuclear chromatin	-0.353259	-1.65612	0	0.0366511	276		ACTL6A;ACTR5;ANP32E;APPL1;AR;ARID1A;ARID1B;ASF1B;ASH2L;ASXL1;ASXL2;ATRX;BAZ1A;BICRAL;BPTF;BRD8;BRMS1L;CBX1;CBX5;CDCA5;CDK12;CDK9;CENPA;CENPC;CHD3;CHD4;CHD5;CHRAC1;CPSF6;CREB1;CREBBP;CTNNB1;DBF4B;DHX9;DNMT3A;E2F1;EED;EME1;EP400;ESCO2;ESR1;EZH2;FER;GABPA;GATA3;GATAD2B;HAT1;HDAC1;HDAC2;HMGB1;HMGB2;HMGB3;HMGXB4;HNRNPK;INO80;KAT6A;KAT6B;KMT5C;MCMBP;MCRS1;MEF2A;MEF2C;MIXL1;MPHOSPH8;NASP;NCAPD3;NCOR1;NF…
GO:0015629	actin cytoskeleton	-0.334111	-1.63962	0	0.0371374	400	SYNPO	ACACA;ACTN4;ACTR2;ACTR3;ADD1;AFAP1L1;AIF1L;ANLN;APBB3;ARHGAP35;BMF;CALD1;CAP2;CCDC102A;CD2AP;CDC42BPA;CDC42BPB;CENPQ;CLDN5;CLIC4;CNN3;CORO1A;CTNNA1;DAAM1;FBLIM1;FER;FERMT2;FILIP1;FLNA;FLNB;FYN;GAS2L3;GBP1;GBP2;GNG12;HIP1;HIP1R;IQGAP1;IQGAP2;JUP;KNTC1;LCP1;LMOD2;MOBP;MYH10;MYH14;MYH9;MYL2;MYLK3;MYO18B;MYO19;MYO1D;MYO1E;MYO5A;MYO5B;MYO5C;MYO6;MYO9A;NDC1;NOX4;PAWR;PDLIM5;PLS3;POU6F1;PTK2;RAPGEF3;RCS…
GO:0044445	cytosolic part	0.33988	1.6097	0	0.0386263	214		AHR;BAIAP2;BCAS4;BLOC1S1;BLOC1S2;BLOC1S3;BLOC1S4;BORCS7;BORCS8;CASP4;CCT2;CCT8;CIAO1;CIAO2B;CTU1;ENO1;ENO2;FADD;FXN;FXR2;GET4;HOMER1;HPS1;HPS5;HPS6;HSPA8;KXD1;NAA10;NCS1;PFKM;PI4K2A;PIN1;PPP3CC;PSMC4;PSMC5;PSMD14;PSMD2;RACK1;RPL10A;RPL11;RPL13;RPL13A;RPL15;RPL17;RPL17-C18orf32;RPL18;RPL18A;RPL19;RPL21;RPL22;RPL22L1;RPL23;RPL23A;RPL24;RPL26L1;RPL27;RPL27A;RPL28;RPL29;RPL30;RPL31;RPL32;RPL34;RPL35;…
GO:1990391	DNA repair complex	-0.459376	-1.60478	0.0211538	0.0396862	40		ATP23;CETN3;DCLRE1C;EFCAB11;ERCC4;LIG4;MLH1;MSH2;MSH4;MSH5;NHEJ1;PMS1;POLD1;PRKDC;RCOR1;SLX4;SWSAP1;TP53BP1;WRN;XPA;XRCC1;XRCC4;XRCC5;XRCC6
GO:0000803	sex chromosome	-0.53153	-1.6192	0.0221402	0.0405321	22		CDK2;DNMT3A;EED;ESCO2;HNRNPU;PCGF5;PLK4;SMARCC1;SMC5;SMC6;SUZ12
GO:0017053	transcriptional repressor complex	-0.411432	-1.60821	0.00371747	0.0417272	75		APPL1;ARID4A;BAZ2A;CBX5;CHD3;CHD4;CHD5;CTBP2;DEPDC1;DR1;GATAD2B;HDAC1;HDAC4;HDGF;HMGB1;LIN52;LIN9;N4BP2L2;NCOR1;PHF12;RBBP4;RBBP7;RCOR1;RELB;SIN3A;SIRT1;SMARCA5;SP1;SP3;SPEN;SUV39H1;TBL1XR1;YWHAB;ZBTB16
GO:0032993	protein-DNA complex	-0.385892	-1.57983	0.00184162	0.0441238	94		ATF6B;CDC45;CDC5L;CENPA;CTC1;CTNNB1;DONSON;ESR1;GINS1;GINS4;GTF2E1;HELB;HHEX;HP1BP3;JUP;KAT6A;KAT6B;KDM5A;MED1;MPHOSPH8;NFE2L2;NFYC;PARP1;POLA1;POLA2;POLD1;POLD3;PRKDC;RPA1;RPA3;SHPRH;SLF1;SOS1;SOS2;SP1;SP3;SUZ12;TCF7L2;WRN
GO:0005911	cell-cell junction	-0.328812	-1.58407	0	0.0452964	326	CXADR;SYNPO	ACTN4;ACTR3;ADD1;AFDN;APC;ARVCF;ATP2A2;BMPR2;CD2AP;CDC42BPA;CDC42BPB;CDCA3;CDH13;CDH5;CLDN23;CLDN5;CLIC4;CNN3;CNTNAP1;CORO1A;CTNNA1;CTNND1;CXADR;CYTH1;DAG1;ECT2;F11R;FLNA;FRMD4A;GJC1;IQGAP1;IQGAP3;ITGA6;JAML;JUP;KLHL24;KRIT1;MAGI3;MARVELD2;MPDZ;MYH9;MYO1E;NCK1;NECTIN3;P2RX7;PACSIN2;PCDH1;PDLIM1;PDLIM5;PDZD2;PIKFYVE;PKN2;PKP2;PLCG1;PNN;PTK7;RAPGEF2;SAPCD2;SCN5A;SHROOM2;SHROOM3;SHROOM4;SNAP23;SORBS…
GO:1904949	ATPase complex	-0.38649	-1.56558	0.0036036	0.046841	88		ACTL6A;ACTR5;ANP32E;APPL1;ARID1A;ARID1B;ATAD5;ATP1B1;ATP1B3;BAZ1A;BICRAL;BPTF;BRD8;CHD3;CHD4;CHD5;CHRAC1;EP400;FXYD2;GATAD2B;HDAC1;HDAC2;HMGXB4;INO80;MCRS1;PBRM1;PHF10;RB1;RBBP4;RBBP7;RFC1;SMARCA4;SMARCA5;SMARCC1;SMARCC2;SMARCD1;SRCAP;SS18L1;SUZ12;TRRAP;UCHL5
GO:0005732	small nucleolar ribonucleoprotein complex	0.510693	1.55664	0.0503145	0.0518513	21		GAR1;NOLC1;NOP10;NOP56;NOP58;POP4;POP7;RRP9;SNU13
GO:0031300	intrinsic component of organelle membrane	0.333576	1.55766	0	0.0546587	200		ABCD1;AFG3L2;B4GAT1;BET1L;BID;BNIP3;CHCHD10;CHCHD3;CHCHD6;CHST2;COA3;COX16;CSGALNACT2;DNAJC11;DNAJC5;EMC6;ERGIC2;ERGIC3;GALNT2;ITM2B;MFF;MGARP;MICOS13;MPC1;MPC2;MREG;MUL1;P2RX5;P2RX6;PEX10;PEX11A;PEX16;PEX2;PINK1;PISD;POMGNT1;PTPRS;QSOX1;RAB11B;RAB3A;RAB4A;RER1;RFNG;RNF152;SCO1;SCO2;SGMS2;SLC22A17;SLC25A17;SLC35A1;SLC35A2;SLC35B2;SLC35B3;SLC35B4;SLC39A13;SLC6A9;SLC8B1;SPG7;STX10;STX1A;SYN1;SYNGR1…
GO:0031252	cell leading edge	-0.317141	-1.52661	0	0.0584104	326		AAK1;ABI2;ACTN1;ACTR2;ACTR3;AIF1L;AJUBA;AKAP5;ALS2;APC;ARAP3;ARHGAP31;ARHGAP45;ARHGEF6;ARHGEF7;ARPIN;BMX;C2CD5;CCDC88A;CD2AP;CDC42BPA;CDC42BPB;CLASP2;CLIP1;CORO1A;CTNNA1;CTNNB1;CTNND1;CXCR4;CYFIP1;DAG1;DIAPH1;DNM2;DPYSL3;DYSF;EPS8L1;FER;FERMT2;FGD4;FGD5;FGD6;FLOT2;FRMD4B;HDAC6;HIP1R;ILK;INPP5E;INPP5K;IQGAP1;IQGAP2;ITGAV;ITGB3;ITSN1;JMY;KANK1;KIF18A;KLHL2;KSR1;LCP1;LDB2;MACF1;MCC;MKLN1;MTM1;MYH10;…
GO:0034708	methyltransferase complex	-0.363351	-1.52774	0.00707965	0.0607766	112		AEBP2;ASH2L;BPTF;C17orf49;CBLL1;CBX5;CHD8;EED;EZH1;EZH2;HCFC1;HCFC2;HDAC2;HDAC9;JARID2;KANSL1;KDM5A;KDM5B;KDM5D;KDM6A;KMT2A;KMT2B;KMT2C;KMT2D;MCRS1;METTL14;METTL3;MGA;MTF2;NCOA6;PAXIP1;PHF19;POGZ;PRDM10;RBBP4;RBBP5;RBBP7;RBM15;RNF2;RNMT;SETD1A;SETD1B;SIRT1;SNRPG;SUZ12;TAF1;TAF6;TRIM37;TRMT61B;UTY;VIRMA;WDR4;WDR82;ZC3H13;ZNF407;ZNF451;ZNF462
GO:0101031	chaperone complex	0.496739	1.49551	0.0386965	0.0778028	20		BAG2;BAG3;CCT2;CCT8;CDC37;HSPA8;HSPB8;STIP1;STUB1
GO:0005875	microtubule associated complex	-0.348471	-1.48438	0.0092081	0.0778835	128		AURKA;CCDC65;CDCA8;CENPE;DNAH17;DNHD1;DYNC1I2;HAUS2;HAUS3;HAUS4;HAUS5;HAUS6;HAUS8;HDAC6;KIF11;KIF12;KIF13A;KIF14;KIF15;KIF17;KIF18A;KIF18B;KIF19;KIF1B;KIF20A;KIF20B;KIF22;KIF23;KIF24;KIF26A;KIF2A;KIF2C;KIF4A;KIF5B;KIFAP3;KIFC1;KLC4;MAP2;NDE1;RABGAP1;SHTN1;SNX4;TPR;TRIM54;YWHAE
GO:0005874	microtubule	-0.305604	-1.47581	0	0.0801503	355		APC;ARFGEF2;ASPM;ATAT1;AURKA;AURKB;CAMSAP2;CDC27;CDK1;CDK2AP2;CDK5RAP2;CENPE;CENPJ;CEP162;CEP170;CEP295;CEP57L1;CKAP2;CKAP5;CLASP1;CLASP2;CLIP1;CLTC;DNAH17;DNM1L;DNM2;DYNC1I2;DYNC1LI2;DYSF;FAM161A;GAS2L3;GTSE1;HAUS2;HAUS3;HAUS4;HAUS5;HAUS6;HAUS8;HDAC6;HID1;HNRNPU;HOOK3;INCENP;INVS;IQGAP1;KIF11;KIF12;KIF13A;KIF14;KIF15;KIF17;KIF18A;KIF18B;KIF19;KIF1B;KIF20A;KIF20B;KIF22;KIF23;KIF24;KIF26A;KIF2A;KI…
GO:0005775	vacuolar lumen	0.333724	1.46861	0	0.0812142	135	SDC1; FTL;GPC1;GLB1;C3	ACP2;ANXA2;ARSA;ASAH1;C3;C6orf120;CHID1;CSPG4;CTSC;CTSD;CTSF;CTSL;DPP7;FMOD;FTL;GBA;GLB1;GM2A;GPC1;GYG1;HEXA;HEXB;HRNR;HSP90AA1;HSPA8;IDUA;LIPA;MPO;NAGLU;PDGFRB;PRDX6;PRELP;PSAP;PTGES2;PYGB;RNASET2;SDC1;SDC3;SMPD1;TOLLIP;VAT1;VCAN
GO:0005796	Golgi lumen	0.390343	1.47206	0.0249433	0.082997	51	SDC1;GPC1;MUC20	CSPG4;GAS6;GPC1;LRPAP1;MMP11;MMP14;MUC20;PODXL2;PRELP;SDC1;SDC3;VCAN;VTN;WNT5B
GO:0031227	intrinsic component of endoplasmic reticulum membrane	0.331453	1.47247	0.00449438	0.0871046	135		ALG3;AMFR;AUP1;BCAP31;BSCL2;DERL2;DHRS9;DNAJB2;DOLK;DPAGT1;DPM2;ELOVL1;ELOVL7;EMC10;EMC3;EMC4;EMC6;EMC7;ERGIC2;ERGIC3;EXT1;FICD;FKBP8;GPAA1;GRAMD1A;GRAMD2A;HLA-DRB1;HLA-G;HM13;LNPK;MMGT1;PORCN;RHBDD1;RTN1;SARAF;SEC61A1;SGMS2;SLC35B2;SLC35B3;SLC35B4;SLC37A2;SPCS1;SPPL2B;TAPT1;TBL2;TMCO1;UBXN8;ZFYVE27;ZMPSTE24
GO:0098858	actin-based cell projection	-0.326703	-1.43475	0.00543478	0.105494	157	CXADR	ATP6V1B1;ATP8B1;CD302;CDC14A;CLIC4;CXADR;CYFIP1;DMD;FGD4;FMR1;IQGAP2;ITGA6;ITGAV;LCP1;MTM1;MYO5A;MYO6;PDGFA;RAPGEF3;RAPH1;RUFY3;SHTN1;SRCIN1;SYNE2;TMC1;VCAM1
GO:0005793	endoplasmic reticulum-Golgi intermediate compartment	0.330724	1.42513	0.0180587	0.105975	109		ANPEP;ARFGAP2;ASPSCR1;AZIN2;BCAP31;CA4;CCDC115;CD59;CHP1;CNIH1;CNIH3;COL7A1;COPB1;COPG2;CTSC;CTSZ;ERGIC2;ERGIC3;GNPNAT1;GOSR2;KDELR1;LMAN2;LMAN2L;LRPAP1;MAN1A1;MCFD2;RAB1B;RAB37;RAB6B;RER1;RGMB;SCYL1;SEC22B;SLC35C2;STX5;TMED1;TMED3;TMED4;TMED5;TMED6;TRAPPC5;YIF1A;YKT6
GO:0042579	microbody	0.325097	1.41137	0.0133929	0.1114	117	CAT	ABCD1;ACAA1;ACOT2;ACSL1;AMACR;ATAD1;CAT;CROT;ECI2;EPHX2;GRHPR;LACC1;MAP2K2;MFF;MIEF2;MLYCD;MPV17L;MUL1;NUDT12;PECR;PEX10;PEX11A;PEX16;PEX19;PEX2;PEX7;PHYH;PMVK;PRDX5;SCP2;SERHL2;SLC25A17;SOD1;SYT7;TMEM35A;TTC1;TYSND1
GO:0005681	spliceosomal complex	-0.315922	-1.41995	0.00880282	0.113772	171		ADAR;AQR;CDC5L;CRNKL1;CWC22;DDX23;DDX39B;DDX5;DHX15;DHX38;DHX8;EFTUD2;FRG1;GEMIN2;GPATCH1;GPKOW;HNRNPA1;HNRNPA2B1;HNRNPA3;HNRNPF;HNRNPH1;HNRNPH3;HNRNPK;HNRNPM;HNRNPR;HNRNPU;ISY1-RAB43;KHDC4;LSM5;LUC7L2;LUC7L3;MYEF2;PNN;PPWD1;PRPF38A;PRPF38B;PRPF39;PRPF40A;PRPF4B;PRPF8;RBM17;RBM28;RBM41;RBM5;RBM8A;RBMXL1;RNPC3;SCAF8;SF1;SF3B1;SF3B3;SNRNP200;SNRNP35;SNRNP40;SNRNP48;SNRPA;SNRPG;SREK1;SRRM1;SRRM2;SRS…
GO:0097730	non-motile cilium	-0.351983	-1.40849	0.0236364	0.11932	88		ABCA4;ANO2;ARL13B;ATP8A2;CDC14A;CEP89;DHRS3;DNAAF4;FAM161A;GNB1;IFT122;KIF17;KIFAP3;MERTK;MYO5A;MYRIP;NPHP4;PCDHB13;PDE6A;PHLPP1;PHLPP2;PKD1L1;PROM1;PRPH2;RAB27A;RAB8A;RGS9;RP1;RP1L1;RPGR;SHOC2;SPTBN5;TUBG1;TULP3;USH2A;WDR19
GO:0005774	vacuolar membrane	0.280081	1.38848	0.00247525	0.124751	344	ABCA2;TLR9	ABCA13;ABCA2;ABCD1;ACP2;ANPEP;ANXA2;AP1M1;AP1S1;AP1S3;AP2A1;AP2A2;AP2S1;AP3B1;AP5B1;AP5S1;ATG16L1;ATP6V0A4;ATP6V0B;ATP6V0C;ATP6V0D1;ATP6V1D;ATP6V1E1;ATP6V1F;ATP6V1G1;ATP6V1H;ATRAID;B4GALT1;BLOC1S1;BLOC1S2;BORCS7;BORCS8;BRI3;CCDC115;CD164;CD63;CD68;CLCN7;CLTA;CPNE1;CYB561A3;CYBRD1;DAGLB;DNAJC5;DPP4;DRAM1;DRAM2;EEF1A2;ENPP1;GABARAP;GBA;GFAP;GLMP;GOPC;GPLD1;GPR137B;HLA-DRB1;HPS6;HSPA8;ITFG2;ITM2C;KP…
GO:0010008	endosome membrane	0.271994	1.36619	0.00496278	0.129818	404	ACE;TLR4;TLR9	ABCA7;ADRB2;AMN;ANTXR2;ANXA2;AP2A1;AP2A2;AP2S1;APH1B;APPL2;ARC;ATP6V0A4;ATP6V0B;ATP6V0C;ATP6V0D1;ATP6V0E1;ATP6V0E2;BACE1;CD63;CD68;CHMP1A;CHMP1B;CHMP4C;CHMP5;CLIP3;CLTA;CYB561A3;EGFR;EHD1;ERBB2;GNPNAT1;GOSR2;GPNMB;HGS;HLA-DRB1;HLA-G;IRAK1;ITM2B;LAMTOR1;LAMTOR4;LAMTOR5;LAPTM4B;LTV1;MCOLN1;MMGT1;MREG;NAPEPLD;PARM1;PDLIM4;PI4K2A;PIP4P2;PLEKHB2;PLEKHM1;PLEKHM2;PLIN3;PMEPA1;PRAF2;PSD;PSENEN;RAB10;RAB1…
GO:0031514	motile cilium	0.316546	1.3687	0.0188235	0.132449	110	CAT	AK8;BBS4;CABCOCO1;CATSPER3;CATSPERE;CCDC103;CFAP43;DYNC2H1;DYNC2LI1;EFCAB2;GABARAP;GSTM3;HYAL3;IFT46;IQUB;NME5;PFKM;ROPN1L;SAXO1;SLC9B1;SLC9B2;SLIRP;SORD;SPA17;SPACA9;SPAG16;TCP11;TPGS1;TSGA10;WBP2NL
GO:0030133	transport vesicle	0.279047	1.3727	0.00251889	0.133587	287		AMPH;AP1S1;AP2A1;AP3S1;APBA2;APH1B;ATP6V0D1;AZIN2;BACE1;BCL2L1;BIN1;BLOC1S3;BRSK1;CA4;CD59;CHP1;CLTA;CLTB;CLTCL1;CNIH1;CNIH3;COPE;COPG2;COPS4;COPZ1;CPE;DLG4;DNAJC5;FGFRL1;GIPC1;GOPC;GOSR2;HLA-DRB1;HLA-G;IL33;KDELR1;KIF1A;M6PR;MAP6;MCFD2;MFF;NPTX1;OVGP1;PDCD6;PEBP1;PEF1;PI4K2A;PLIN3;PTPRS;RAB3A;RAB4A;RAB9A;RABEPK;SCAMP1;SCAMP2;SCAMP5;SEC13;SEC22B;SGTA;SH3GL2;SIPA1;SLC17A5;SLC6A9;SLC9B2;SNAP47;SPRE…
GO:0005798	Golgi-associated vesicle	0.300397	1.34948	0.0240175	0.141382	145		AP1S1;AP2A1;ARFGAP2;BACE1;CCDC115;CD59;CHIC2;CLTA;CLTB;CLTCL1;CNGB1;CNIH1;CNIH3;COL7A1;COPB1;COPE;COPG2;COPZ1;CTSC;CTSZ;ERGIC2;ERGIC3;GOPC;GOSR2;HLA-DRB1;HLA-G;ITM2B;KDELR1;LMAN2;LMAN2L;MAP6;MAP6D1;MCFD2;PDCD6;PEF1;PITPNM3;RAB8B;SCFD1;SCYL1;SEC13;SEC22B;SPG21;SPPL2B;STK26;STX5;TMED1;TMED3;TMED4;TMED6;VPS41;VTI1B;YIF1A
GO:0019867	outer membrane	0.290727	1.33123	0.0205479	0.155188	180	TSPO	ACSL1;AIFM2;AMBRA1;ANKH;ARMCX1;ASS1;ATP5MC3;BAD;BCL2L1;BCL2L10;BID;BNIP3;BNIP3L;BRI3BP;CISD2;GK;HADHB;HAX1;HK2;LETMD1;MFF;MIEF2;MTX1;MUL1;NAV3;PEBP1;PI4KB;PINK1;PLD6;PPP1R15A;PSEN1;SAMM50;SIGMAR1;SPATA18;STARD7;TIGAR;TOMM20;TOMM22;TOMM34;TOMM40;TOMM5;TOMM7;TOMM70;TRIM14;TSPO;UBA52;UBB;ULK1;VAT1;VDAC1;VDAC2
GO:1905360	GTPase complex	-0.444805	-1.33709	0.0900196	0.195608	21		DNAJC25-GNG10;GNA13;GNAI1;GNAI2;GNAI3;GNAS;GNAT2;GNB1;GNG11;GNG12;GNG5;GNG7
GO:0009295	nucleoid	0.359709	1.2846	0.103093	0.204653	41		ATAD3A;GRSF1;HADHB;HSPA9;LONP1;MPG;POLDIP2;POLRMT;SHMT2;SUPV3L1;TEFM;TFB2M;TRMT10C;TUFM;UQCC2;VDAC1;VDAC2
GO:0000792	heterochromatin	-0.345312	-1.31693	0.0847784	0.208845	69		ATRX;BAZ2A;CBX1;CBX2;CBX5;CENPA;CENPC;CHD5;DNMT1;DNMT3A;EME1;ESCO2;HDAC1;HELLS;INCENP;KMT5C;MPHOSPH8;ORC2;SIRT1;SUV39H1;SUZ12;TOP2B;UHRF2;WDR76
GO:0032153	cell division site	-0.346145	-1.31031	0.082243	0.211626	61		ANLN;CENPC;CEP55;CIT;ECT2;KIF20A;KLHDC8B;MASTL;MYH10;MYH9;MZT1;NDE1;PKN2;PLK4;RACGAP1;RALA;RHOB;RND1;RTKN;SPIRE2;SSH1;TUBGCP3;TUBGCP6
GO:0098552	side of membrane	-0.274297	-1.31738	0.0220588	0.215691	319	TNF	ABCG1;ACE;AKAP5;ATP2A2;BCAM;BTN2A2;BTNL9;CALR;CAV2;CCR10;CD163L1;CD274;CD33;CD34;CD69;CDH13;CDIP1;CHUK;CLEC12B;CXCL12;CXCR4;CYTH1;DAG1;ECE1;EFNA5;EPB41;ESYT1;FER;FERMT2;FYN;GFRA1;GNA13;GNAI1;GNAI2;GNAI3;GNAS;GNG12;GNRH1;GPIHBP1;HIP1;HLA-E;IDE;IL13RA1;IL27RA;IL3RA;IL6R;IQGAP1;ITGA6;ITGAM;ITGAV;JUP;KRAS;LAG3;LDLR;LEPR;LRRK2;MCAM;NCAM1;P2RX7;PECAM1;PKP4;PTP4A1;PTPN4;PTPN7;RACGAP1;RASAL3;RTN4R;S1PR1;…
GO:0016234	inclusion body	-0.338455	-1.29647	0.0884477	0.22538	71		AGL;ATXN3;DBF4B;DVL2;HDAC6;HOXD3;HTT;LRRK2;NUP153;NXF1;PICALM;RANBP2;SLF1;SLFN11;SYNE2;TPR;TRIM37;WDFY3;ZBTB14;ZDHHC17
GO:0031225	anchored component of membrane	0.297776	1.26152	0.0756303	0.230224	93	GPC1;TFPI	ART3;CD59;DNAJC5;FOLR3;GPC1;LY6E;LYPD3;MELTF;MMP17;OTOA;PLAUR;PRNP;RAB3A;RAB4A;RECK;RGMB;TFPI;TREH
GO:0097223	sperm part	0.285382	1.2526	0.0904977	0.236741	118	CAT	AK8;ALDOA;ARC;BSG;CABCOCO1;CATSPER3;CATSPERE;CRCP;DKKL1;DNAJB1;GABARAP;GSTM3;HEXB;HYAL3;IQUB;NME5;PCSK4;PFKM;POMT1;RAB3A;SAXO1;SLC9B1;SLC9B2;SLIRP;SPA17;SPACA9;SPAG16;TCP11;WBP2NL
GO:0099568	cytoplasmic region	-0.26468	-1.28395	0.0140105	0.238054	381		ACTN4;ACTR2;AKAP12;ANLN;ARFGEF2;ARHGEF7;BLOC1S5;C2CD5;CALD1;CAP2;CCDC65;CCN2;CD302;CENPF;CEP162;CFAP221;CFAP54;CLASP2;CLDN5;CORO1A;CTBP2;CTNND1;DNAH17;EPB41;EXOC3L1;EXOC6;FER;FERMT2;FLNA;FLNB;FMNL1;FMR1;FNBP1L;FRYL;GPSM2;GYPC;HIP1;HIP1R;ITPR2;KIF17;KIF19;KIF1B;KIF5B;KIFAP3;LAMC2;LCA5;LLGL2;MAP2;MAPK1;MAPRE1;MELK;MICAL3;MKLN1;MOBP;MYH10;MYH9;MYO5B;MYO6;NEDD9;PHLDB2;PIK3R4;PLA2G4C;PTK2;RAPGEF3;RASA…
GO:0030990	intraciliary transport particle	0.379317	1.23464	0.181223	0.257899	27		CLUAP1;DYNC2LI1;IFT22;IFT46;IFT57;TRAF3IP1;TTC30B
GO:1902493	acetyltransferase complex	-0.311384	-1.24827	0.0910747	0.270062	90		ACTL6A;BRD8;BRPF1;CREBBP;DR1;EP400;HCFC1;JADE1;KANSL1;KANSL1L;KAT6A;KAT6B;MORF4L2;MSL3;NAA30;PHF10;SUPT7L;TADA2A;TAF2;TAF5;TAF5L;TAF6;TRRAP;UBAP2L;USP22;YEATS2
GO:0000118	histone deacetylase complex	-0.334367	-1.2606	0.129944	0.270332	58		APPL1;BRMS1L;CBX5;CHD3;CHD4;CHD5;GATAD2B;HDAC1;HDAC4;HDAC5;HDAC6;HDAC7;HDAC9;MECOM;NCOR1;PHF12;RBBP4;RBBP7;RERE;SAP30;SIN3A;SINHCAF;TAL1;TBL1XR1;ZNF217
GO:0032039	integrator complex	-0.457103	-1.25556	0.181087	0.270919	16		INTS1;INTS2;INTS6L;INTS7;NIPBL;ZNF609
GO:0005697	telomerase holoenzyme complex	-0.427382	-1.24973	0.170213	0.275043	19		HNRNPU;LSM11;SMG6;SMG7;TEP1;WRAP53
GO:0001891	phagocytic cup	-0.425026	-1.23839	0.206564	0.27968	20		ARHGAP25;CDC42SE2;CORO1A;DNM2;LCP1;MEGF10;TNF
GO:0098984	neuron to neuron synapse	-0.261187	-1.22251	0.0689655	0.280664	266		ACTR2;ADAM10;AKAP5;AKAP7;ALS2;ARFGEF2;BMPR2;CACNG8;CAP2;CHRNA3;CNN3;CTNND1;DNAJC6;DROSHA;EEF2K;EFNB3;EGLN1;EPB41;ERBB4;FMR1;FYN;GRIK4;HIP1R;HNRNPA3;LRRTM2;MAPK1;MPDZ;NECTIN3;P2RX4;PAK3;PDLIM5;PJA2;RAPGEF4;RGS9;RNF19A;SHANK3;SLC30A3;SRCIN1;SRGAP2;STAT3;TANC1;UNC13B;VPS35;YWHAZ
GO:0030055	cell-substrate junction	-0.253535	-1.23345	0.0338983	0.280993	388	LAP3	ACTN1;ACTN4;ACTR2;ACTR3;ADAM10;ADD1;AFAP1;AIF1L;AJUBA;AKAP12;ALCAM;ARHGAP26;ARHGAP31;ARHGEF7;ATAT1;CALR;CAV1;CAV2;CBL;CD46;CDH13;CLASP1;CLASP2;CLTC;CNN3;CSRP2;CTNNA1;CTNNB1;CYFIP1;DAG1;DIXDC1;DMD;DNM2;FBLIM1;FBLN7;FERMT2;FHL1;FLII;FLNA;FLNB;FLOT2;FLRT1;FLRT2;FOCAD;FZD1;GIT2;GNA13;HNRNPK;HSP90B1;HSPA5;HSPG2;HYOU1;ILK;IQGAP1;ITGA6;ITGAV;ITGB3;ITGBL1;JAK1;JUP;KIF23;KLF11;KRAS;LAP3;LCP1;LMLN;LPP;MAPK…
GO:0060076	excitatory synapse	-0.38223	-1.22436	0.188433	0.28438	27		AKAP5;CADPS2;CYFIP1;LRRTM2
GO:0043025	neuronal cell body	0.243014	1.1953	0.0606796	0.324624	344	PMM1	AMFR;APBB1;ARC;ASS1;ATXN10;AZIN2;BACE1;BMPR1A;C4A;CAPN2;CCN3;CHRNA10;CIB1;CNNM4;CPE;CYBA;DLG3;DNAJB1;DVL1;ELK1;GJC2;GLRX2;GRIN3A;GRIN3B;HPCA;IGSF9B;KCNAB1;KCNJ14;KCNN4;KIF1A;KLHL17;LRP1;MAP1A;MBP;MUL1;NCDN;NPTX2;NSMF;P2RX6;PEBP1;PGRMC1;PI4K2A;PLK3;PMM1;PRKAA2;PSEN1;PSEN2;PTPRS;RET;RIN1;SERPINF1;SERPINI1;SH3GL2;SIAH2;SKOR1;SLC25A27;SLC31A1;SLC4A8;SMN1;SNAP47;SNPH;SOD1;SYAP1;TXN2;UBB;UCHL1;VTI1B;YK…
GO:0097060	synaptic membrane	0.237553	1.14638	0.130326	0.428172	273		ADCY1;ANK2;ANKS1B;APBB1;ARC;ATAD1;CADM3;CAMK2N1;CDH10;CHRM4;CHRNA10;CLSTN2;CLSTN3;CLTA;CLTB;CNIH3;COL13A1;COMT;CPE;CRYAB;DAGLB;DLG3;DLG4;DLG5;DNAJA3;FOSL1;GABBR2;GPER1;GRIN3A;GRIN3B;GRM2;HSPA8;IGSF9B;INSYN1;KCNMA1;KLHL17;LIN7B;LRFN3;LRFN4;LRRC7;NCS1;NPTN;NSMF;NTNG2;P2RX6;PDLIM4;PI4K2A;PRR7;PSD3;PSEN1;PSEN2;PTPRS;RIMS1;RUSC1;SH2D5;SHANK1;SHC4;SIGMAR1;SLC6A4;SLC6A9;SNPH;SRPX2;STX1A;STXBP1;SYAP1;SYT7
GO:0042827	platelet dense granule	0.424786	1.13062	0.303901	0.459416	13		ABCC4;CD63;CDC37L1
GO:0005770	late endosome	0.239849	1.12098	0.171233	0.461743	207	CD79A	ANKRD13D;ANXA2;ASTN2;BACE1;CD63;CD79A;CHID1;CHMP1A;CHMP1B;CHMP4C;CLTCL1;CYB561A3;DDIT3;DERL2;EGFR;GNPNAT1;GOSR2;HLA-DRB1;HSPA8;IL12A;LAMTOR1;LAMTOR4;LAMTOR5;LAPTM4B;LTV1;M6PR;MAGI2;MAP2K2;MCOLN1;MREG;NAPSA;OSBPL1A;PARM1;PIP4P2;RAB9A;RILP;RNF215;SLC11A1;SLC31A1;SLC31A2;SLC9A9;SRC;STARD3;STEAP3;STOML1;STX8;TMEM106B;TMEM230;TMEM59;TMEM9;UBXN6;VPS16;VPS18;VPS26B;VPS33A;VPS33B;VPS37D;VPS41;VPS4A;VTI1B…
GO:0033267	axon part	0.227355	1.1105	0.166667	0.466412	279		AMFR;ANK2;AP1S1;AP3S1;APBB1;ATP6V0D1;AUTS2;BIN1;BLOC1S1;BLOC1S2;BLOC1S3;BLOC1S4;BRSK1;CIB1;CNGB1;CTSZ;CTTN;DLG3;DLG4;DOCK7;DVL1;ELK1;EPB41L3;EPS8;FKBP4;GIT1;GJC2;GPER1;HSPA8;IGHMBP2;KCNAB1;KIF1A;KIF5A;LRRC7;MAP1A;MAPK8IP1;MBP;NCS1;NFASC;NGEF;NPTX2;PCDH9;PEBP1;PINK1;PSEN1;RAB21;RAB3A;RAC3;ROBO2;SCN8A;SERPINF1;SIGMAR1;SOD1;SPG7;SPOCK1;SYAP1;SYBU;SYT7;TBC1D24;TOR1A;TWF2;UCHL1;ZFYVE27;ZPR1
GO:0005795	Golgi stack	0.259148	1.12254	0.197425	0.469645	111	ST3GAL4	B3GALT6;B4GALT7;BCAP31;CHPF;CHPF2;CLIP3;CSGALNACT2;FUT4;FUT8;NAGPA;NECAB3;PLK3;PSENEN;RAB21;RAB34;SORL1;ST3GAL3;ST3GAL4;TMED3;TMEM115;TMEM59;TRAPPC4;UXS1;VCPIP1
GO:0055037	recycling endosome	0.248222	1.11359	0.211137	0.46989	148		ACKR1;ANK2;ARHGAP44;BACE1;CLIP3;CLTCL1;DYNC1I1;EHD1;ENTR1;GPER1;HLA-G;PDLIM4;PHETA1;PLEKHB2;RAB10;RAB11FIP1;RAB11FIP5;RAB13;RAB4A;RABGEF1;RELCH;SCAMP1;SCAMP2;SCAMP3;SCAMP4;SCAMP5;SLC26A7;SLC31A1;SLC31A2;SLC39A4;SLC9A7;SLC9A9;SORL1;STX8;TBC1D14;TMEM230;ULK1;VPS16;VPS33B;VPS53;VTI1B;WASHC1;ZFYVE27
